# Supplementary material for: Synthesis of zeolites P1 and SUZ-4 through a synergy of organic N,N,N,N′,N′,N′-hexaethylpentanediammonium and inorganic cations
Source: Royal Society of Chemistry journal article supplement (doi:10.1039/b004004p), 2000-01-01
Supplement: b004004p.doc [file b004004p.doc]

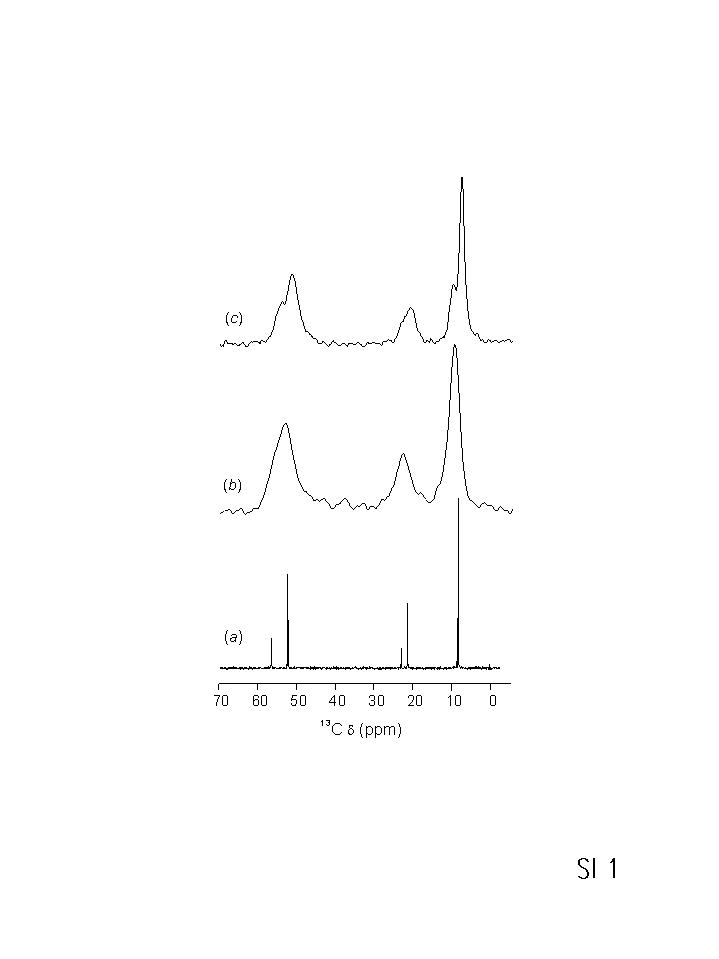


SI 1. 13C NMR spectra of organic SDA, Et6-diquat-5: (*a*) 13C NMR of a CDCl3 solution of the bromide form of Et6-diquat-5, and 1H-13C CP/MAS NMR of as-synthesized (*b*) P1 and (*c*) SUZ-4 with Et6-diquat-5 occluded in their pores.


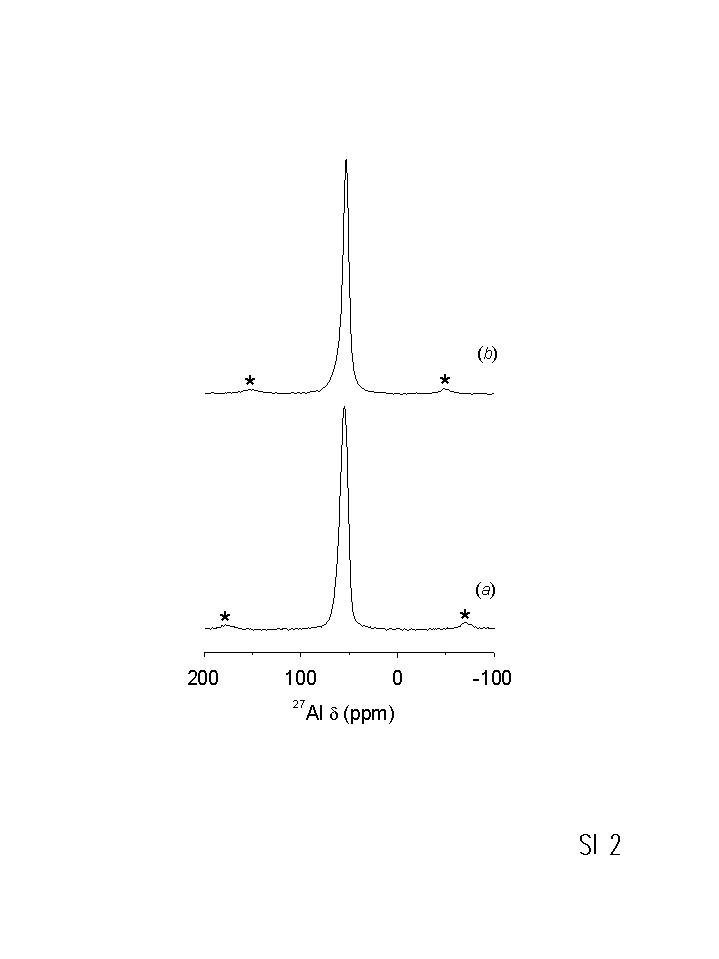


SI 2. 27Al NMR spectra of as-synthesized P1 (*a*) and SUZ-4 (*b*).
